# Supplementary material
Source: PubMed Central journal article supplement (PMC2206590)

**log CSP**

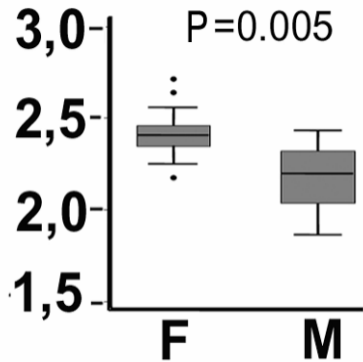

**log MSP119**

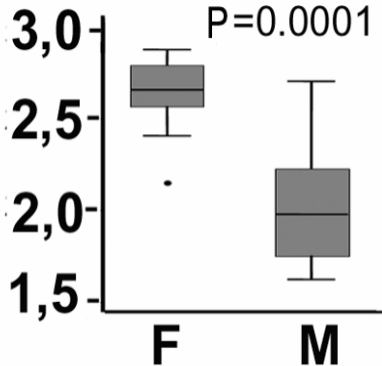

Supplement: pnas_0709969105_1.pdf [file pnas_0709969105_1.pdf]
